# Supplementary material for: Melanin nanoparticles as an actinide in vivo sequestration agent with radiation protection effect
Source: Royal Society of Chemistry journal article supplement (doi:10.1039/d1nj00999k), 2021-01-01
Supplement: d1nj00999k1.pdf [file d1nj00999k1.pdf]

## Supporting Information *for*

### **Melanin Nanoparticles as an Actinide in vivo Sequestration Agent with Radiation Protection Effect**

Yu Miao,<sup>‡ab</sup> Jie Sheng,<sup>‡b</sup> Xiaomei Wang,<sup>‡b</sup> Cen Shi,<sup>b</sup> Qiwen Sun,<sup>b</sup> Tonghuan Liu<sup>\*a</sup> and Juan Diwu <sup>\*b</sup>

<sup>a</sup>. Radiochemistry Laboratory, School of Nuclear Science and Technology, Lanzhou University, Lanzhou 730000, China

<sup>b</sup>. State Key Laboratory of Radiation Medicine and Protection, School for Radiological and Interdisciplinary Sciences (RAD-X) and Collaborative Innovation Center of Radiation Medicine of Jiangsu Higher Education Institutions, Soochow University, Suzhou 215123, China

\*Corresponding authors. Email: [liuth@lzu.edu.cn](mailto:liuth@lzu.edu.cn); [diwujuan@suda.edu.cn](mailto:diwujuan@suda.edu.cn)

## S1. UV-vis spectrum

(a)

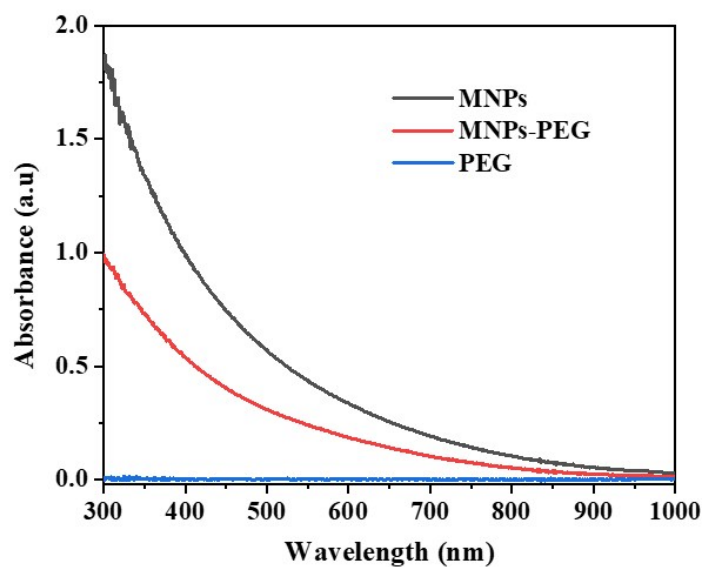

(b)

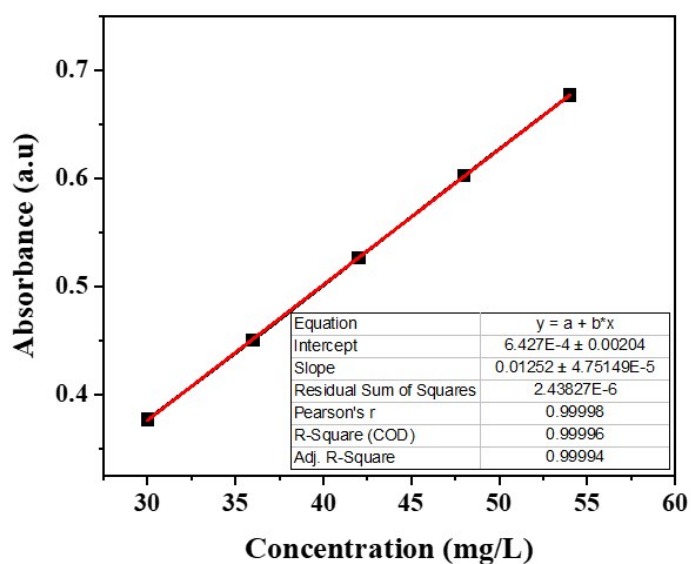

Figure S1. (a) UV-vis-NIR absorption spectra of MNPs (60 ppm), MNPs-PEG (60 ppm) and PEG (1000 ppm). (b) Absorbance of different concentrations of MNPs at 450 nm.

## S2. Zeta potential

Table S1. Zeta potential of MNPs and MNPs-PEG.

|          | Zeta potential (mV) |
|----------|---------------------|
| MNPs     | $-24.0 \pm 1.1$     |
| MNPs-PEG | $-18.4 \pm 1.5$     |

### S3. Adsorption selectivity

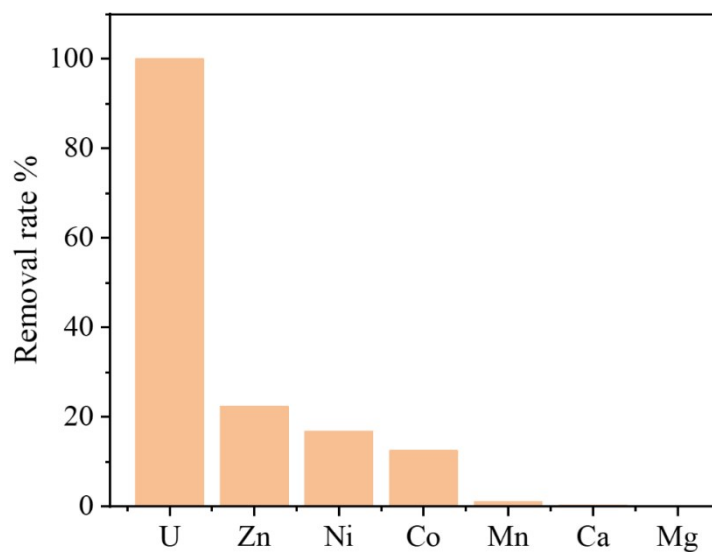

Figure S2. Adsorption behavior of MNPs-PEG towards uranium and divalent essential metal ions (pH = 7.4, 50 mmol/L Tris-HCl buffer, m/V = 0.3 g/L, T = 310 K, the initial concentration of uranium is 2.4 ppm, and the initial concentration of interfering ions are about 40 ppm).

### S4. Cytotoxicity assays.

Table S2. Dosage-dependent growth rate of NRK-52E cells treated with  $\text{UO}_2(\text{NO}_3)_2 \cdot 6\text{H}_2\text{O}$ , values were presented as means  $\pm$  SD (n=4). (Data from reference 1)

| Concentration of uranium ( $\mu\text{g}/\text{mL}$ ) | Survival Rate (%) |
|------------------------------------------------------|-------------------|
| 1.48                                                 | 96.7 $\pm$ 4.3    |
| 2.95                                                 | 90.9 $\pm$ 0.1    |
| 5.90                                                 | 71.2 $\pm$ 1.3    |
| 11.80                                                | 68.5 $\pm$ 1.9    |
| 21.23                                                | 63.3 $\pm$ 1.8    |

Table S3. Dosage-dependent growth rate of AML-12 cells treated with  $\text{Th}(\text{NO}_3)_4 \cdot 6\text{H}_2\text{O}$ , values were presented as means  $\pm$  SD (n = 6).

| <b>Concentration of thorium (<math>\mu\text{g}/\text{mL}</math>)</b> | <b>Survival Rate (%)</b> |
|----------------------------------------------------------------------|--------------------------|
| 3.7                                                                  | 100.4 $\pm$ 3.2          |
| 7.4                                                                  | 94.4 $\pm$ 2.0           |
| 14.8                                                                 | 95.7 $\pm$ 4.8           |
| 29.7                                                                 | 89.4 $\pm$ 5.1           |
| 59.3                                                                 | 88.5 $\pm$ 4.3           |
| 118.7                                                                | 74.7 $\pm$ 2.2           |

### S5. ROS level assays.

Table S4. ROS level of normal NRK-52E cells and NRK-52E cells treated with U(VI), U(VI) + DTPA, and U(VI) + MNPs-PEG, values were presented as means  $\pm$  SD (n=3).

| <b>Group</b>     | <b>ROS</b>       |
|------------------|------------------|
| Normal           | 131.0 $\pm$ 8.0  |
| U(VI)            | 272.7 $\pm$ 51.2 |
| U(VI) + DTPA     | 232.0 $\pm$ 23.5 |
| U(VI) + MNPs-PEG | 133.3 $\pm$ 13.2 |

Table S5. ROS level of normal AML-12 cells and AML-12 cells treated with Th(IV), Th(IV) + DTPA, and Th(IV) + MNPs-PEG, values were presented as means  $\pm$  SD (n=3).

| <b>Group</b>      | <b>ROS</b>    |
|-------------------|---------------|
| Normal            | 2.3 $\pm$ 1.7 |
| Th(IV)            | 8.3 $\pm$ 0.9 |
| Th(IV) + DTPA     | 5.7 $\pm$ 0.8 |
| Th(IV) + MNPs-PEG | 2.3 $\pm$ 0.5 |

## Reference

- (1) C. Shi, X. Wang, J. Wan, D. Zhang, X. Yi, Z. Bai, K. Yang, J. Diwu, Z. Chai, and S. Wang *Bioconjugate Chem.*, 2018, 29, 3896-3905.
